# Supplementary material for: In vitro Generation of Cytotoxic T Cells With Potential for Adoptive Tumor Immunotherapy of Multiple Myeloma
Source: PubMed Central journal article supplement (PMC6687956; doi:10.3389/fimmu.2019.01792), 2019-08-02
Supplement: Image_3.pdf [file Image_3.pdf]

Supplementary figure 3

A

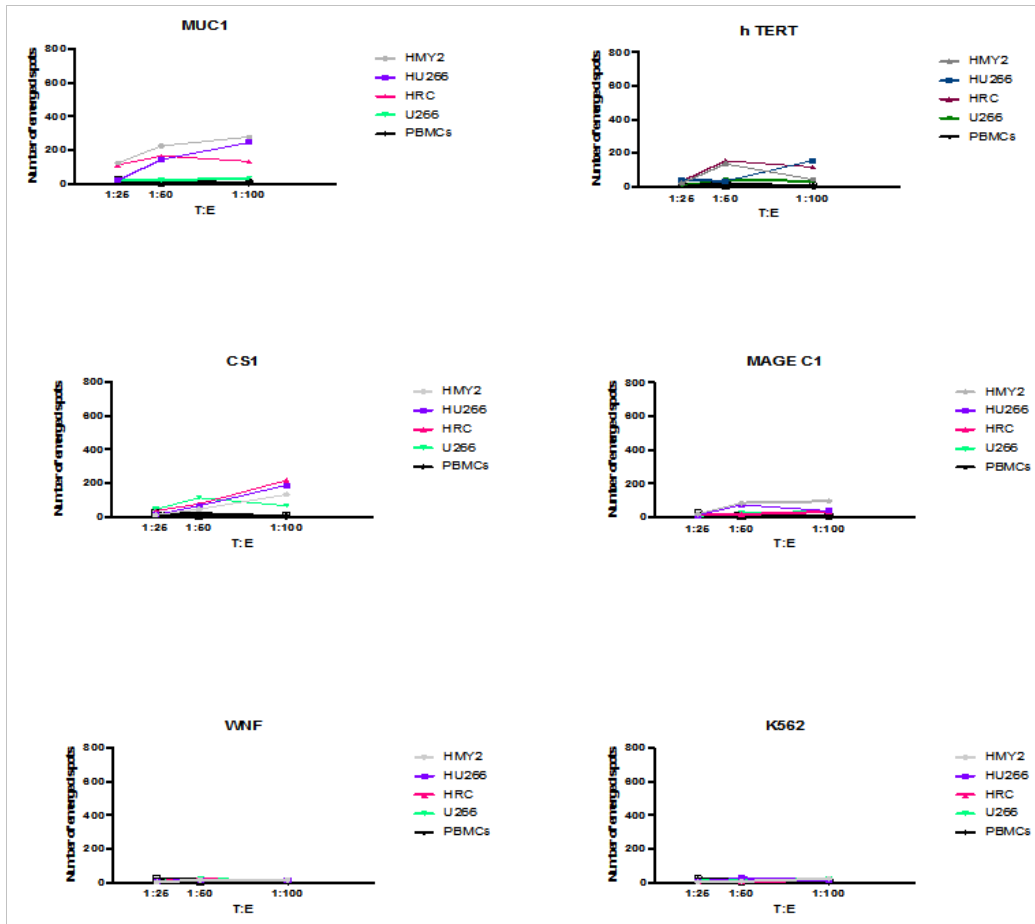

B

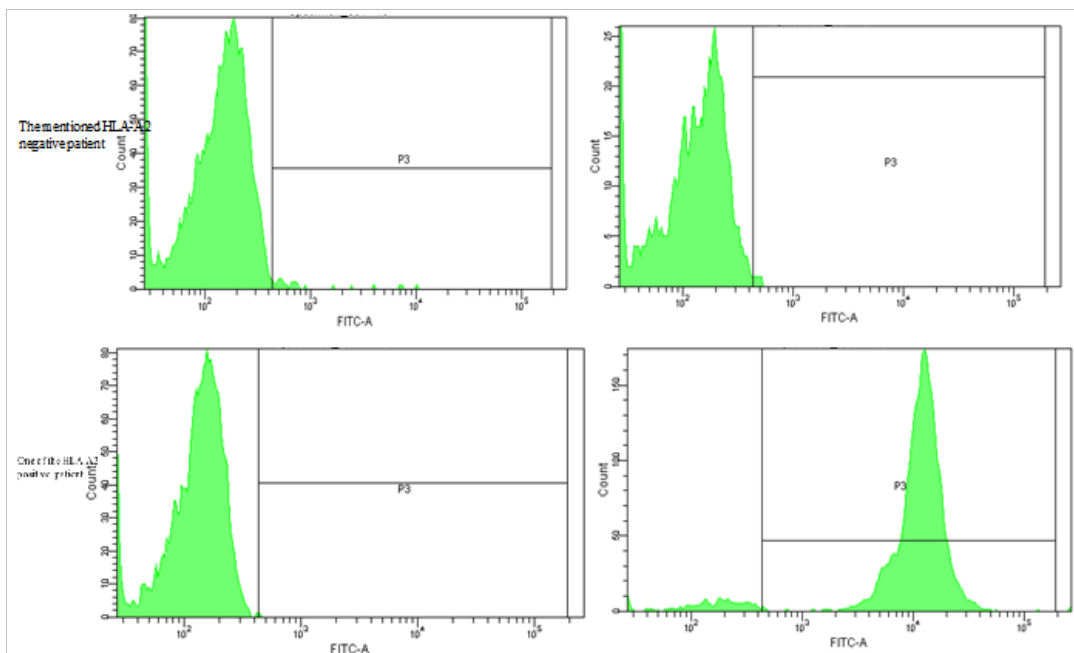

C

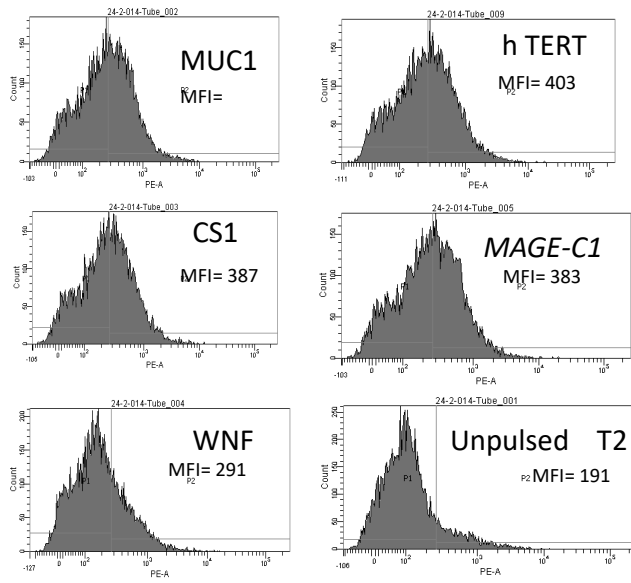

D

| Antigen                  | Peptide sequence | MFI after loading on T2 cells | Binding prediction score (Syfpeithi score) |
|--------------------------|------------------|-------------------------------|--------------------------------------------|
| <b>MUC1</b>              | LLLLTVLTV        | 394                           | 31                                         |
| <b>hTERT</b>             | ILAKFLHWL        | 403                           | 30                                         |
| <b>CS1</b>               | SLFVLGLFL        | 387                           | 25                                         |
| <b>MAGE-C1</b>           | ILFGISLREV       | 383                           | 18                                         |
| <b>WNF</b>               | LGMSNRDFL        | 291                           | 13                                         |
| <b>Unpulsed T2 cells</b> | N/A              | 191                           | N/A                                        |
